# Supplementary material
Source: Springer Nature journal article supplement (https://www.springermedizin.de/resource/supplementary/12967_2011_993_MOESM2_ESM.pdf/9577252)

Function

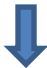

Analysis

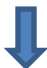

Criteria

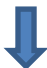

Synthesis

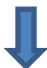

Provisional design

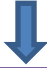

Simulation

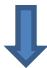

Expected properties

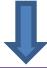

Evaluation

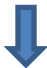

Value of the design

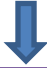

Decision

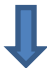

Approved design

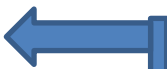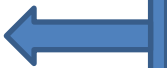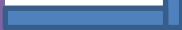

Supplement: MOESM2 [file 9577252]
